# Supplementary material for: ADAR1 is a new target of METTL3 and plays a pro-oncogenic role in glioblastoma by an editing-independent mechanism
Source: PubMed Central journal article supplement (PMC7842030; doi:10.1186/s13059-021-02271-9), 2021-01-28

Figure 1b

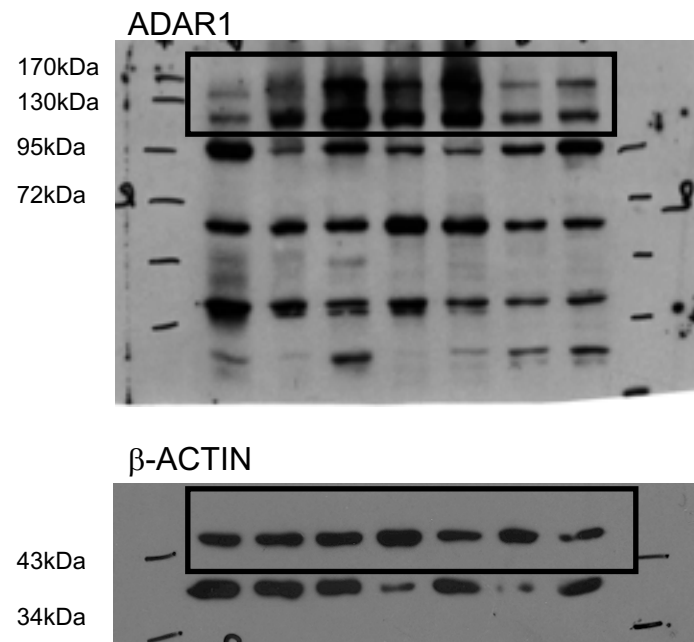

Figure 2e

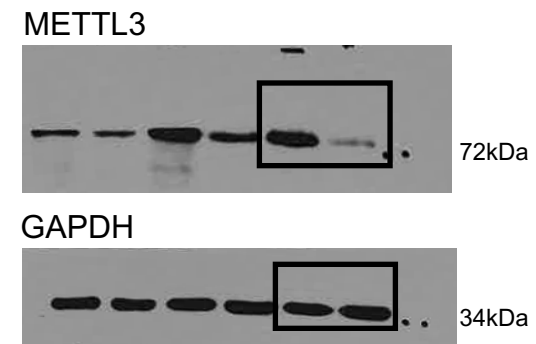

Figure 3b

ADAR1

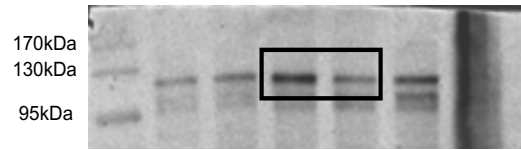

YTHDF1

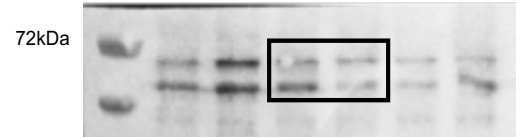

GAPDH

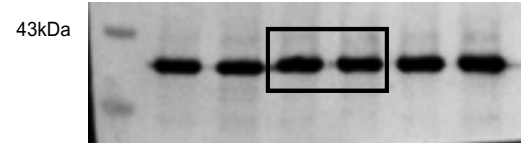

Figure 3c

YTHDF1

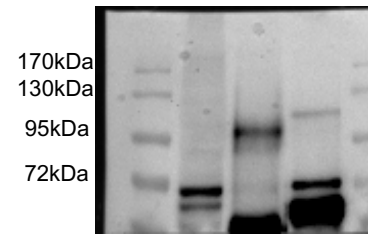

Figure 3d

FLAG-RPL22

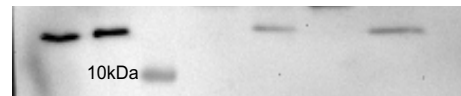

GAPDH

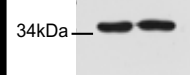

Figure 3f

ADAR1

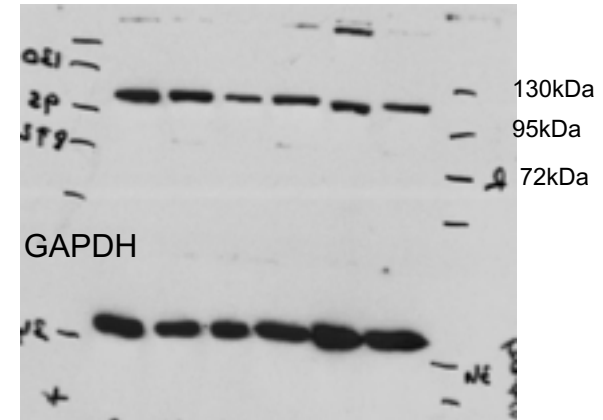

ADAR2

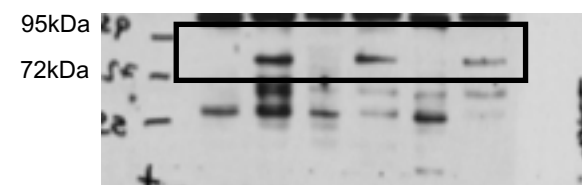

UBIQUITIN

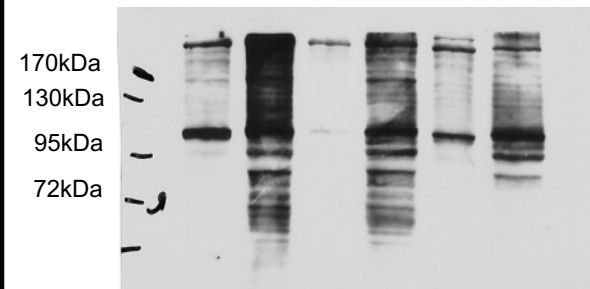

Figure 3f

ADAR1

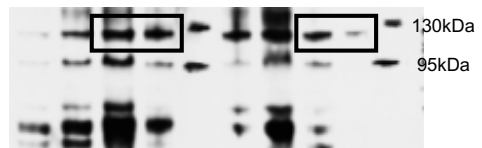

GAPDH

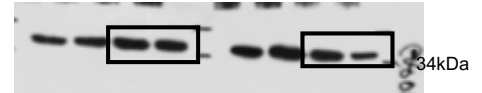

YTHDF1

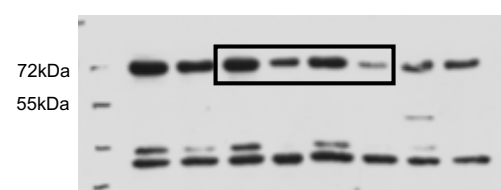

GAPDH

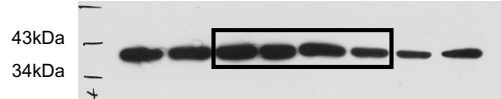

Figure 4a

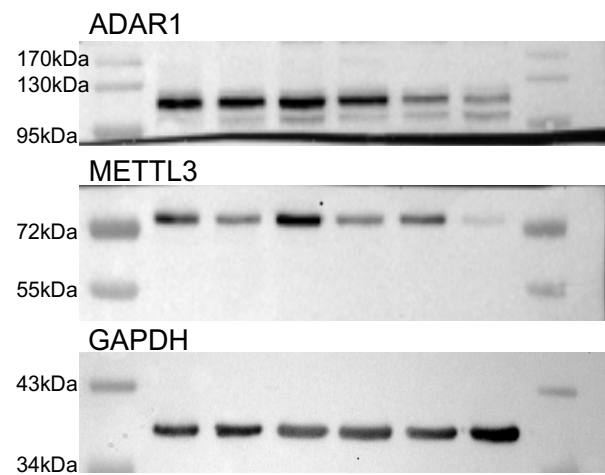

Figure 5b

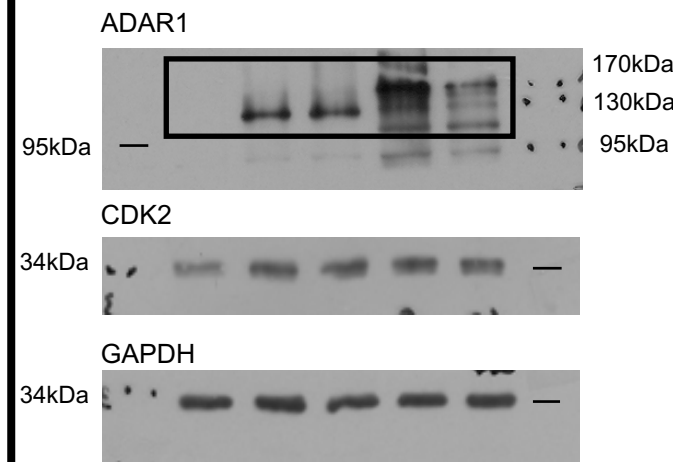

Figure 5d

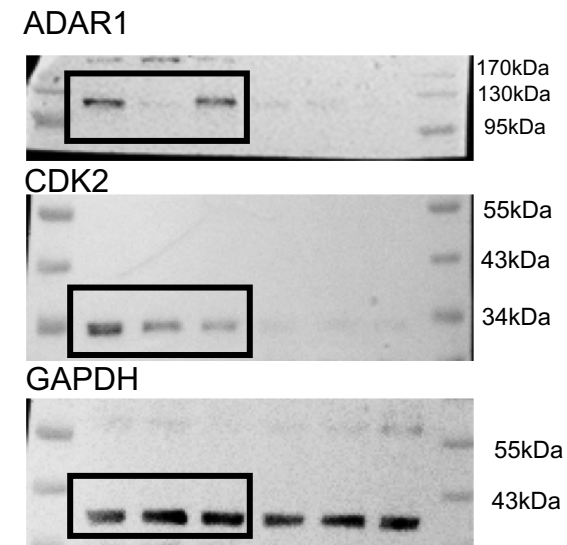

Figure 5e

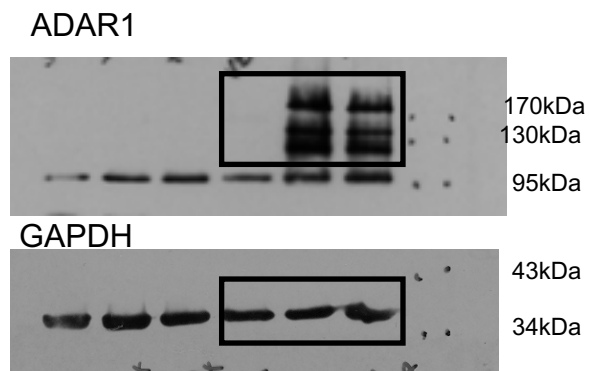

Supplement: 13059_2021_2271_MOESM3_ESM.pdf [file 13059_2021_2271_MOESM3_ESM.pdf]
